# Supplementary material for: Selective blockade of the inhibitory Fcγ receptor (FcγRIIB) in human dendritic cells and monocytes induces a type I interferon response program
Source: PubMed Central journal article supplement — J Exp Med. 2007 Jun 11;204(6):1359–69. doi: 10.1084/jem.20062545 (PMC2118610; doi:10.1084/jem.20062545), 2007-06-11
Supplement: jexpmed_jem.20062545_1.pdf [file jexpmed_jem.20062545_1.pdf]

# Dhodapkar et al., <http://www.jem.org/cgi/content/full/jem.20062545/DC1>

## THE MINIMUM INFORMATION ABOUT A MICROARRAY EXPERIMENT (MIAME) CHECKLIST

### Experimental design

- The goal of the experiment is to compare the gene expression profiles of monocyte-derived DCs treated with isotype control antibody, anti-Fc $\gamma$ RIIB blocking antibody, or a cocktail of inflammatory cytokines.
- In brief, purified monocytes were cultured to obtain monocyte-derived immature DCs. DCs on day 5 of culture were treated with isotype control mAb or anti-Fc $\gamma$ RIIB mAb or matured with a cocktail of inflammatory cytokines. 24 h later, DCs were harvested and RNA was isolated using the RNeasy kit.
- Keywords: DCs, Fc receptor.
- The experimental factors are treatment with anti-Fc $\gamma$ RIIB antibody versus control (24 h).
- In the experimental design, samples obtained from five different blood donors were used for the experiments, as described.

### Samples used, extract preparation, and labeling

- The origin of each biological sample was healthy adult blood donors.
- Technical protocols for preparing the hybridization extract were as follows: Cells were pelleted in the RLT buffer, and total RNA was extracted using the RNeasy kit (QIAGEN) following the manufacturer's protocol.

### Hybridization procedures and parameters

1–2  $\mu$ g of total RNA was labeled and hybridized using the ENZO T7 labeling kit (Life Sciences), as per the manufacturer's protocol, on GeneChip Human Genome U133 Plus 2.0 microarrays (Affymetrix). Washing and scanning was done on Fluidics Station 400 (Affymetrix) and GeneChip Scanner 3000 (Affymetrix) following the manufacturer's protocol.

### Measurement data and specifications

- Data
  - Data was scanned using Genechip Scanner 3000 using the manufacturer's protocol.
  - GCOS 1.2 software (Affymetrix) was used to obtain the raw signal and present/absent gene data.

### Array Design

- Commercial GeneChip Human Genome U133 Plus 2.0 microarrays were used.

### Data analysis

- The methodology for analysis of microarray data was adapted from that used by Napolitani et al. (38). The microarray data was normalized as follows. The signal values  $>0.01$  were set to 0.01. The percentile for all of the measurements in each sample was calculated using the values for all genes not marked "absent." Each measurement was divided by the 50th percentile of all measurements in that sample. Each gene was then divided by the median of its measurements in all samples. Genes that were marked as present and expressed above a raw level of 100 were included in the analysis. 29,499 genes passed this filter. Gene expressions in DCs treated with inflammatory cytokines, Fc $\gamma$ RIIB blocking antibody, and isotype control antibody were compared, and genes with statistically different expression between the groups based on the values of the replicates were calculated using a parametric test with variance assumed equal (ANOVA) using a P-value cut off of 0.05, followed by Benjamin and Hochberg false discovery rate multiple-test correction. A gene list of 4,759 significant genes was obtained and used to determine fold changes in expression between the 3 different conditions. Of these, 1,801 genes were twofold or higher differentially regulated between Fc $\gamma$ RIIB antibody-treated DCs compared with isotype control antibody-treated DCs.

**Table S1.** List of genes differentially expressed in anti-FcγRIIB antibody treated DCs

| <b>Probe ID</b>                          | <b>Fold change</b> | <b>Name</b> | <b>Full Name</b>                                                         |
|------------------------------------------|--------------------|-------------|--------------------------------------------------------------------------|
| <b>Type I Interferon Inducible Genes</b> |                    |             |                                                                          |
| 202411_at                                | 41.18              | IFI27       | interferon, α-inducible protein 27                                       |
| 204439_at                                | 35.73              | C1orf29     | chromosome 1 open reading frame 29                                       |
| 219519_s_at                              | 12.61              | SN          | sialoadhesin                                                             |
| 210118_s_at                              | 12.64              | IL1A        | interleukin 1, α                                                         |
| 242625_at                                | 10.38              | cig5        | viperin                                                                  |
| 200986_at                                | 10.13              | SERPING1    | serine (or cysteine) proteinase inhibitor, clade G (C1 inhibitor)        |
| 202086_at                                | 9.746              | MX1         | myxovirus (influenza virus) resistance 1                                 |
| 219211_at                                | 9.578              | USP18       | ubiquitin specific protease 18                                           |
| 214022_s_at                              | 7.176              | IFITM1      | interferon induced transmembrane protein 1 (9-27)                        |
| 229450_at                                | 6.437              | IFIT4       | interferon-induced protein with tetratricopeptide repeats 4              |
| 226702_at                                | 5.744              | LOC129607   | hypothetical protein LOC129607                                           |
| 223659_at                                | 5.469              | MSP         | mosaic serine protease                                                   |
| 204415_at                                | 5.346              | G1P3        | interferon, α-inducible protein (clone IFI-6-16)                         |
| 209969_s_at                              | 4.839              | STAT1       | signal transducer and activator of transcription 1, 91 kD                |
| 214038_at                                | 4.532              | CCL8        | Monocyte chemotactic protein 2.                                          |
| 204972_at                                | 4.574              | OAS2        | 2'-5'-oligoadenylate synthetase 2, 69/71 kD                              |
| 208436_s_at                              | 4.558              | IRF7        | interferon regulatory factor 7                                           |
| 203153_at                                | 4.448              | IFIT1       | interferon-induced protein with tetratricopeptide repeats 1              |
| 203915_at                                | 4.42               | CXCL9       | chemokine (C-X-C motif) ligand 9                                         |
| 218400_at                                | 4.316              | OAS3        | 2'-5'-oligoadenylate synthetase 3, 100 kD                                |
| 219863_at                                | 4.43               | CEB1        | cyclin-E binding protein 1                                               |
| 211267_at                                | 4.183              | HESX1       | homeo box (expressed in ES cells) 1                                      |
| 229625_at                                | 3.95               | GBP5        | guanylate binding protein 5                                              |
| 209417_s_at                              | 3.873              | IFI35       | interferon-induced protein 35                                            |
| 214453_s_at                              | 3.621              | IFI44       | interferon-induced protein 44                                            |
| 210797_s_at                              | 3.444              | OASL        | <i>Homo sapiens</i> 2'-5'-oligoadenylate synthetase-related protein p30. |
| 209035_at                                | 3.381              | MDK         | midkine (neurite growth-promoting factor 2)                              |
| 204994_at                                | 3.343              | MX2         | myxovirus (influenza virus) resistance 2 (mouse)                         |
| 218986_s_at                              | 3.363              | FLJ20035    | hypothetical protein FLJ20035                                            |
| 212203_x_at                              | 3.13               | IFITM3      | interferon-induced transmembrane protein 3 (1-8U)                        |
| 238581_at                                | 3.016              | GBP5        | guanylate binding protein 5                                              |
| 226757_at                                | 3.015              | IFIT2       | interferon-induced protein with tetratricopeptide repeats 2              |
| 223220_s_at                              | 2.947              | BAL         | B aggressive lymphoma gene                                               |
| 202145_at                                | 2.722              | LY6E        | lymphocyte antigen 6 complex, locus E                                    |
| 200923_at                                | 2.678              | LGALS3BP    | lectin, galactoside-binding, soluble, 3 binding protein                  |
| 218943_s_at                              | 2.341              | DDX58       | DEAD/H (Asp-Glu-Ala-Asp/His) box polypeptide                             |
| 242234_at                                | 2.105              | HSXIAPAF1   | XIAP-associated factor-1                                                 |
| 210354_at                                | 2.155              | IFNG        | Human mRNA for HuIFN-γ interferon.                                       |
| 224701_at                                | 2.432              | KIAA1268    | KIAA1268 protein                                                         |
| 228439_at                                | 2.114              | MGC20410    | hypothetical protein BC012330                                            |
| 202688_at                                | 2.05               | TNFSF10     | TNF (ligand) superfamily, member 10                                      |
| <b>Chemokine-/cytokine-related genes</b> |                    |             |                                                                          |
| 1405_i_at                                | 41.14              | CCL5        | chemokine (C-C motif) ligand 5                                           |
| 210072_at                                | 8.975              | CCL19       | chemokine (C-C motif) ligand 19                                          |
| 219971_at                                | 3.48               | IL21R       | interleukin 21 receptor                                                  |
| 204103_at                                | 2.893              | CCL4        | chemokine (C-C motif) ligand 4                                           |
| 205114_s_at                              | 2.49               | CCL3        | chemokine (C-C motif) ligand 3                                           |
| 209716_at                                | 2.25               | CSF1        | Human macrophage-specific colony-stimulating factor (CSF-1)              |

|                                          |       |           |                                                                                                              |
|------------------------------------------|-------|-----------|--------------------------------------------------------------------------------------------------------------|
| 212659_s_at                              | 2.099 | IL1RN     | interleukin 1 receptor antagonist                                                                            |
| <b>FcR-/Ig-/complement-related genes</b> |       |           |                                                                                                              |
| 208747_s_at                              | 21.97 | C1S       | complement component 1, s subcomponent                                                                       |
| 235400_at                                | 9.668 | FREB      | Fc receptor homolog expressed in B cells                                                                     |
| 206881_s_at                              | 7.737 | LILRA3    | leukocyte immunoglobulin-like receptor, subfamily A, member 3                                                |
| 208792_s_at                              | 4.234 | CLU       | clusterin (complement lysis inhibitor)                                                                       |
| 1552806_a_at                             | 2.021 | SIGLEC10  | sialic acid binding Ig-like lectin 10                                                                        |
| <b>Miscellaneous genes</b>               |       |           |                                                                                                              |
| 1553602_at                               | 71.74 | LOC118430 | small breast epithelial mucin                                                                                |
| 204475_at                                | 54.39 | MMP1      | matrix metalloproteinase 1 (interstitial collagenase)                                                        |
| 206134_at                                | 22.07 | ADAMDEC1  | ADAM-like, decysin 1                                                                                         |
| 222935_x_at                              | 19.92 | SLC39A8   | solute carrier family 39 (zinc transporter), member 8                                                        |
| 202833_s_at                              | 8.611 | SERPINA1  | serine (or cysteine) proteinase inhibitor, clade A ( $\alpha$ -1 antiproteinase, antitrypsin), member 1      |
| 202628_s_at                              | 5.367 | SERPINE1  | serine (or cysteine) proteinase inhibitor, clade E (nexin, plasminogen activator inhibitor type 1), member 1 |
| 204625_s_at                              | 6.787 | ITGB3     | integrin, $\beta$ 3 (platelet glycoprotein IIIa, antigen CD61)                                               |
| 206022_at                                | 5.214 | NDP       | Norrie disease (pseudoglioma)                                                                                |
| 217897_at                                | 4.151 | FXYP6     | FXYP domain containing ion transport regulator 6                                                             |
| 232119_at                                | 4.008 | SYNPO2    | synaptopodin 2                                                                                               |
| 206513_at                                | 3.571 | AIM2      | absent in melanoma 2                                                                                         |
| 207015_s_at                              | 2.717 | ALDH1A2   | aldehyde dehydrogenase 1 family, member A2                                                                   |
| 200628_s_at                              | 2.63  | WARS      | tryptophanyl-tRNA synthetase                                                                                 |
| 203642_s_at                              | 2.538 | COBL1     | COBL-like 1                                                                                                  |
| 211812_s_at                              | 2.388 | B3GALT3   | UDP-Gal: $\beta$ GlcNAc $\beta$ 1,3-galactosyltransferase, polypeptide 3                                     |
| 205990_s_at                              | 2.268 | WNT5A     | wingless-type MMTV integration site family, member 5A                                                        |
| 201061_s_at                              | 2.222 | STOM      | <i>Homo sapiens</i> erythrocyte membrane protein mRNA                                                        |
| 201641_at                                | 2.191 | BST2      | bone marrow stromal cell antigen 2                                                                           |
| 208886_at                                | 2.171 | H1F0      | H1 histone family, member 0                                                                                  |
| 209198_s_at                              | 2.101 | SYT11     | synaptotagmin XI                                                                                             |
| 225342_at                                | 2.019 | AK3       | adenylate kinase 3                                                                                           |
| 205611_at                                | 0.426 | TNFSF12   | APO3/DR3 ligand                                                                                              |
| <b>Unknown Genes</b>                     |       |           |                                                                                                              |
| 231688_at                                | 11.4  |           | Transcribed sequences                                                                                        |
| 211429_s_at                              | 6.956 |           | PRO2275 mRNA, complete cds                                                                                   |
| 1569095_at                               | 4.733 |           | Clone IMAGE:4133286, mRNA                                                                                    |
| 220950_s_at                              | 4.586 | FLJ10081  | hypothetical protein FLJ10081                                                                                |
| 1554905_x_at                             | 4.488 | FKSG44    | hypothetical protein FKSG44                                                                                  |
| 219352_at                                | 4.055 | FLJ20637  |                                                                                                              |
| 241981_at                                | 4.043 | FAM20A    | CDNA FLJ27210 fis, clone SYN03494                                                                            |
| 238452_at                                | 3.805 | FLJ31052  | hypothetical protein FLJ31052                                                                                |
| 238219_at                                | 3.704 | FLJ35821  | hypothetical protein FLJ35821                                                                                |
| 235157_at                                | 3.268 |           | <i>Homo sapiens</i> cDNA clone IMAGE:2730894.                                                                |
| 228066_at                                | 3.086 |           | cDNA E130012A19 (LOC390789)                                                                                  |
| 235175_at                                | 3.008 |           | <i>Homo sapiens</i> cDNA clone IMAGE:4480652.                                                                |
| 1559777_at                               | 2.969 |           | clone TESTI2003718                                                                                           |
| 238439_at                                | 2.921 | ANKRD22   | Alu repetitive element; mRNA sequence.                                                                       |
| 237753_at                                | 2.737 |           | Hypothetical protein MGC4027                                                                                 |
| 232375_at                                | 2.151 |           | Clone MAMMA1000643                                                                                           |
| 213607_x_at                              | 2.148 | FLJ13052  | cDNA DKFZp686L22239                                                                                          |
| 215788_at                                | 2.023 | LOC339457 | hypothetical protein LOC339457                                                                               |
| 213167_s_at                              | 2.021 | SLC5A3    | <i>Homo sapiens</i> cDNA clone IMAGE:4397525 .                                                               |
| 204277_s_at                              | 0.499 | TK2       | <i>Homo sapiens</i> cDNA clone IMAGE:3922971.                                                                |

The table shows 95 genes that are differentially expressed in DCs treated with anti-Fc $\gamma$ RIIB antibody (genes shown in the box in Fig. 1 B). Fold change refers to fold increase in gene expression in DCs treated with anti-Fc $\gamma$ RIIB antibody relative to DCs treated with isotype control mouse IgG1 antibody. Interferon response genes were identified by treating DCs with exogenous interferon- $\alpha$  (Table S2).

**Table S2.** List of genes induced by less than fivefold in Mo-DCs 24 h after treatment with 1000 U/ml interferon- $\alpha$ 2 $\beta$  (Intron-A)

| Probe ID     | Name      | Full Name                                                                                                                                                                          |
|--------------|-----------|------------------------------------------------------------------------------------------------------------------------------------------------------------------------------------|
| 226103_at    | NEXN      | nexilin (F actin binding protein)                                                                                                                                                  |
| 204439_at    | C1orf29   | chromosome 1 open reading frame 29                                                                                                                                                 |
| 202411_at    | IFI27     | interferon, $\alpha$ -inducible protein 27                                                                                                                                         |
| 204698_at    | ISG20     | interferon stimulated gene 20 kD                                                                                                                                                   |
| 242625_at    | cig5      | viperin                                                                                                                                                                            |
| 213797_at    | cig5      | viperin                                                                                                                                                                            |
| 1552309_a_at | NEXN      | nexilin (F actin binding protein)                                                                                                                                                  |
| 203153_at    | IFIT1     | interferon-induced protein with tetratricopeptide repeats 1                                                                                                                        |
| 211267_at    | HESX1     | homeo box (expressed in ES cells) 1                                                                                                                                                |
| 202086_at    | MX1       | myxovirus (influenza virus) resistance 1, interferon-inducible protein p78 (mouse)                                                                                                 |
| 217502_at    | IFIT2     | interferon-induced protein with tetratricopeptide repeats 2                                                                                                                        |
| 214022_s_at  | IFITM1    | interferon induced transmembrane protein 1 (9-27)                                                                                                                                  |
| 201601_x_at  | IFITM1    | interferon induced transmembrane protein 1 (9-27)                                                                                                                                  |
| 226702_at    | LOC129607 | hypothetical protein LOC129607                                                                                                                                                     |
| 211122_s_at  | CXCL11    | chemokine (C-X-C motif) ligand 11                                                                                                                                                  |
| 224225_s_at  | ETV7      | ets variant gene 7 (TEL2 oncogene)                                                                                                                                                 |
| 33304_at     | ISG20     | interferon stimulated gene 20 kD                                                                                                                                                   |
| 204747_at    | IFIT4     | interferon-induced protein with tetratricopeptide repeats 4                                                                                                                        |
| 219211_at    | USP18     | ubiquitin specific protease 18                                                                                                                                                     |
| 218400_at    | OAS3      | 2'-5'-oligoadenylate synthetase 3, 100 kD                                                                                                                                          |
| 219519_s_at  | SN        | sialoadhesin                                                                                                                                                                       |
| 219863_at    | CEB1      | cyclin-E binding protein 1                                                                                                                                                         |
| 205660_at    | OASL      | 2'-5'-oligoadenylate synthetase-like                                                                                                                                               |
| 203819_s_at  | IMP-3     | IGF-II mRNA-binding protein 3                                                                                                                                                      |
| 214059_at    | IFI44     | interferon-induced protein 44                                                                                                                                                      |
| 202688_at    | TNFSF10   | tumor necrosis factor (ligand) superfamily, member 10                                                                                                                              |
| 226757_at    | IFIT2     | interferon-induced protein with tetratricopeptide repeats 2                                                                                                                        |
| 229450_at    | IFIT4     | interferon-induced protein with tetratricopeptide repeats 4                                                                                                                        |
| 202687_s_at  | TNFSF10   | tumor necrosis factor (ligand) superfamily, member 10                                                                                                                              |
| 202686_s_at  | AXL       | AXL receptor tyrosine kinase                                                                                                                                                       |
| 205483_s_at  | GIP2      | interferon, $\alpha$ -inducible protein (clone IFI-15K)                                                                                                                            |
| 214329_x_at  | TNFSF10   | xs95h07.x1 NCI_CGAP_Ut4 <i>Homo sapiens</i> cDNA clone IMAGE:2777437 3' similar to contains Alu repetitive element;contains element HGR repetitive element ;, mRNA sequence.       |
| 235574_at    | GBP4      | guanylate binding protein 4                                                                                                                                                        |
| 210797_s_at  | OASL      | interferon-induced protein; 30 kD; alternatively spliced; <i>Homo sapiens</i> 2'-5'oligoadenylate synthetase-related protein p30 (OASL) mRNA, alternatively spliced, complete cds. |
| 205226_at    | PDGFRL    | platelet-derived growth factor receptor-like                                                                                                                                       |
| 242020_s_at  | ZBP1      | Z-DNA binding protein 1                                                                                                                                                            |
| 204972_at    | OAS2      | 2'-5'-oligoadenylate synthetase 2, 69/71 kD                                                                                                                                        |
| 215444_s_at  | TRIM31    | tripartite motif-containing 31                                                                                                                                                     |
| 209417_s_at  | IFI35     | interferon-induced protein 35                                                                                                                                                      |
| 201315_x_at  | IFITM3    | interferon induced transmembrane protein 2 (1-8D)                                                                                                                                  |
| 204415_at    | GIP3      | interferon, $\alpha$ -inducible protein (clone IFI-6-16)                                                                                                                           |
| 214453_s_at  | IFI44     | interferon-induced protein 44                                                                                                                                                      |
| 238091_at    |           | Clone IMAGE:4817555, mRNA                                                                                                                                                          |
| 210873_x_at  | APOBEC3A  | apolipoprotein B mRNA editing enzyme, catalytic polypeptide-like 3A                                                                                                                |
| 200986_at    | SERPING1  | serine (or cysteine) proteinase inhibitor, clade G (C1 inhibitor), member 1, (angioedema, hereditary)                                                                              |

|                             |           |                                                                                                                                                                                                                 |
|-----------------------------|-----------|-----------------------------------------------------------------------------------------------------------------------------------------------------------------------------------------------------------------|
| 210159 s at                 | TRIM31    | tripartite motif-containing 31                                                                                                                                                                                  |
| 218986 s at                 | FLJ20035  | hypothetical protein FLJ20035                                                                                                                                                                                   |
| 223298 s at                 | NT5C3     | 5'-nucleotidase, cytosolic III                                                                                                                                                                                  |
| 202145 at                   | LY6E      | lymphocyte antigen 6 complex, locus E                                                                                                                                                                           |
| 210163 at                   | CXCL11    | chemokine (C-X-C motif) ligand 11                                                                                                                                                                               |
| 211165 x at                 | EPHB2     | EphB2                                                                                                                                                                                                           |
| 235643 at                   | FLJ39885  | hypothetical protein FLJ39885                                                                                                                                                                                   |
| 220059 at                   | BRDG1     | BCR downstream signaling 1                                                                                                                                                                                      |
| 220492 s at                 | OTOF      | otoferlin                                                                                                                                                                                                       |
| 209969 s at                 | STAT1     | signal transducer and activator of transcription 1, 91 kD                                                                                                                                                       |
| 230405 at                   |           | CDNA FLJ46914 fis, clone SPLEN2027852                                                                                                                                                                           |
| 227544 at                   | C14orf83  | y181h11.s1 Soares infant brain 1N1B <i>Homo sapiens</i> cDNA clone IMAGE:44797 3', mRNA sequence.                                                                                                               |
| 1555251 a at                | OTOF      | otoferlin                                                                                                                                                                                                       |
| 212203 x at                 | IFITM3    | interferon induced transmembrane protein 3 (1-8U)                                                                                                                                                               |
| 206008 at                   | TGM1      | transglutaminase 1 (K polypeptide epidermal type I, protein-glutamine- $\gamma$ -glutamyltransferase)                                                                                                           |
| 219691 at                   | FLJ20073  | FLJ20073 protein                                                                                                                                                                                                |
| 235609 at                   | BRIP1     | BRCA1 interacting protein C-terminal helicase 1                                                                                                                                                                 |
| 227609 at                   | EPSTI1    | epithelial stromal interaction 1 (breast)                                                                                                                                                                       |
| 232787 at                   | LOC200213 | hypothetical protein LOC200213                                                                                                                                                                                  |
| 222793 at                   | DDX58     | DEAD/H (Asp-Glu-Ala-Asp/His) box polypeptide                                                                                                                                                                    |
| 203915 at                   | CXCL9     | chemokine (C-X-C motif) ligand 9                                                                                                                                                                                |
| 223220 s at                 | BAL       | B aggressive lymphoma gene                                                                                                                                                                                      |
| 213050 at                   | COBL      | cordon-bleu homolog (mouse)                                                                                                                                                                                     |
| 219352 at                   | FLJ20637  |                                                                                                                                                                                                                 |
| 204187 at                   | GMPR      | guanosine monophosphate reductase                                                                                                                                                                               |
| 225291 at                   | PNPT1     | polyribonucleotide nucleotidyltransferase 1                                                                                                                                                                     |
| 215495 s at                 | SAMD4     | sterile $\alpha$ motif domain containing 4                                                                                                                                                                      |
| 230036 at                   | FLJ39885  | hypothetical protein FLJ39885                                                                                                                                                                                   |
| 228531 at                   | FLJ20073  | oc86b09.s1 NCI_CGAP_GCB1 <i>Homo sapiens</i> cDNA clone IMAGE:135659 3', mRNA sequence.                                                                                                                         |
| 208392 x at                 | SP110     | SP110 nuclear body protein                                                                                                                                                                                      |
| 231455 at                   |           | CDNA FLJ42418 fis, clone BLADE2001987                                                                                                                                                                           |
| 231577 s at                 | GBP1      | guanylate binding protein 1, interferon-inducible, 67 kD                                                                                                                                                        |
| 205692 s at                 | CD38      | CD38 antigen (p45)                                                                                                                                                                                              |
| 219684 at                   | IFRG28    | 28kD interferon responsive protein                                                                                                                                                                              |
| 228230 at                   | PRIC285   |                                                                                                                                                                                                                 |
| 1553785 at                  | RASGEF1B  | RasGEF domain family, member 1B                                                                                                                                                                                 |
| 208436 s at                 | IRF7      | interferon regulatory factor 7                                                                                                                                                                                  |
| 226603 at                   | FLJ39885  | 601660289R1 NIH_MGC_71 <i>Homo sapiens</i> cDNA clone IMAGE:3905950 3', mRNA sequence.                                                                                                                          |
| 206271 at                   | TLR3      | toll-like receptor 3                                                                                                                                                                                            |
| 214511 x at                 | FCGR1A    | Fc fragment of IgG, high affinity Ia, receptor for (CD64)                                                                                                                                                       |
| 206133 at                   | HSXIAPAF1 | synonym: XAF1; isoform 1 is encoded by transcript variant 1; go_function: zinc ion binding [goid 0008270] [evidence IEA]; <i>Homo sapiens</i> XIAP associated factor-1 (HSXIAPAF1), transcript variant 1, mRNA. |
| 219209 at                   | MDA5      | melanoma differentiation associated protein-5                                                                                                                                                                   |
| AFFX-HUMISGF3A/M97935 MA at | STAT1     |                                                                                                                                                                                                                 |
| 202270 at                   | GBP1      | guanylate binding protein 1, interferon-inducible, 67 kD                                                                                                                                                        |

|              |           |                                                                                                       |
|--------------|-----------|-------------------------------------------------------------------------------------------------------|
| 211012 s at  | PML       | promyelocytic leukemia                                                                                |
| 202446 s at  | PLSCR1    | phospholipid scramblase 1                                                                             |
| 209762 x at  | SP110     | SP110 nuclear body protein                                                                            |
| 210705 s at  | TRIM5     | tripartite motif-containing 5                                                                         |
| 243271 at    |           | Transcribed sequences                                                                                 |
| 228439 at    | MGC20410  | hypothetical protein BC012330                                                                         |
| 209589 s at  | EPHB2     | EphB2                                                                                                 |
| 208012 x at  | SP110     | SP110 nuclear body protein                                                                            |
| 202430 s at  | PLSCR1    | phospholipid scramblase 1                                                                             |
| 215444 s at  | TRIM31    | tripartite motif-containing 31                                                                        |
| 209417 s at  | IFI35     | interferon-induced protein 35                                                                         |
| 201315 x at  | IFITM3    | interferon induced transmembrane protein 2 (1-8D)                                                     |
| 204415 at    | G1P3      | interferon, $\alpha$ -inducible protein (clone IFI-6-16)                                              |
| 214453 s at  | IFI44     | interferon-induced protein 44                                                                         |
| 238091 at    |           | Clone IMAGE:4817555, mRNA                                                                             |
| 210873 x at  | APOBEC3A  | apolipoprotein B mRNA editing enzyme, catalytic polypeptide-like 3A                                   |
| 200986 at    | SERPING1  | serine (or cysteine) proteinase inhibitor, clade G (C1 inhibitor), member 1, (angioedema, hereditary) |
| 210159 s at  | TRIM31    | tripartite motif-containing 31                                                                        |
| 218986 s at  | FLJ20035  | hypothetical protein FLJ20035                                                                         |
| 223298 s at  | NT5C3     | 5'-nucleotidase, cytosolic III                                                                        |
| 202145 at    | LY6E      | lymphocyte antigen 6 complex, locus E                                                                 |
| 210163 at    | CXCL11    | chemokine (C-X-C motif) ligand 11                                                                     |
| 211165 x at  | EPHB2     | EphB2                                                                                                 |
| 235643 at    | FLJ39885  | hypothetical protein FLJ39885                                                                         |
| 220059 at    | BRDG1     | BCR downstream signaling 1                                                                            |
| 220492 s at  | OTOF      | otoferlin                                                                                             |
| 209969 s at  | STAT1     | signal transducer and activator of transcription 1, 91 kD                                             |
| 230405 at    |           | CDNA FLJ46914 fis, clone SPLEN2027852                                                                 |
| 227544 at    | C14orf83  | yl81h11.s1 Soares infant brain 1NIB <i>Homo sapiens</i> cDNA clone IMAGE:44797 3', mRNA sequence.     |
| 1555251 a at | OTOF      | otoferlin                                                                                             |
| 212203 x at  | IFITM3    | interferon induced transmembrane protein 3 (1-8U)                                                     |
| 206008 at    | TGM1      | transglutaminase 1 (K polypeptide epidermal type I, protein-glutamine- $\gamma$ -glutamyltransferase) |
| 219691 at    | FLJ20073  | FLJ20073 protein                                                                                      |
| 235609 at    | BRIP1     | BRCA1 interacting protein C-terminal helicase 1                                                       |
| 227609 at    | EPSTI1    | epithelial stromal interaction 1 (breast)                                                             |
| 232787 at    | LOC200213 | hypothetical protein LOC200213                                                                        |
| 222793 at    | DDX58     | DEAD/H (Asp-Glu-Ala-Asp/His) box polypeptide                                                          |
| 203915 at    | CXCL9     | chemokine (C-X-C motif) ligand 9                                                                      |
| 223220 s at  | BAL       | B aggressive lymphoma gene                                                                            |
| 213050 at    | COBL      | cordons-bleu homolog (mouse)                                                                          |
| 219352 at    | FLJ20637  |                                                                                                       |
| 204187 at    | GMPT      | guanosine monophosphate reductase                                                                     |
| 225291 at    | PNPT1     | polyribonucleotide nucleotidyltransferase 1                                                           |
| 215495 s at  | SAMD4     | sterile $\alpha$ motif domain containing 4                                                            |
| 230036 at    | FLJ39885  | hypothetical protein FLJ39885                                                                         |
| 228531 at    | FLJ20073  | oc86b09.s1 NCI_CGAP_GCB1 <i>Homo sapiens</i> cDNA clone IMAGE:1356569 3', mRNA sequence.              |
| 208392 x at  | SP110     | SP110 nuclear body protein                                                                            |
| 231455 at    |           | CDNA FLJ42418 fis, clone BLADE2001987                                                                 |
| 231577 s at  | GBP1      | guanylate binding protein 1, interferon-inducible, 67 kD                                              |

|                             |           |                                                                                                                                                                                                                 |
|-----------------------------|-----------|-----------------------------------------------------------------------------------------------------------------------------------------------------------------------------------------------------------------|
| 205692_s_at                 | CD38      | CD38 antigen (p45)                                                                                                                                                                                              |
| 219684_at                   | IFRG28    | 28kD interferon responsive protein                                                                                                                                                                              |
| 228230_at                   | PRIC285   |                                                                                                                                                                                                                 |
| 1553785_at                  | RASGEF1B  | RasGEF domain family, member 1B                                                                                                                                                                                 |
| 208436_s_at                 | IRF7      | interferon regulatory factor 7                                                                                                                                                                                  |
| 226603_at                   | FLJ39885  | 601660289R1 NIH_MGC_71 <i>Homo sapiens</i> cDNA clone IMAGE:3905950 3', mRNA sequence.                                                                                                                          |
| 206271_at                   | TLR3      | toll-like receptor 3                                                                                                                                                                                            |
| 214511_x_at                 | FCGR1A    | Fc fragment of IgG, high affinity Ia, receptor for (CD64)                                                                                                                                                       |
| 206133_at                   | HSXIAPAF1 | synonym: XAF1; isoform 1 is encoded by transcript variant 1; go_function: zinc ion binding [goid 0008270] [evidence IEA]; <i>Homo sapiens</i> XIAP associated factor-1 (HSXIAPAF1), transcript variant 1, mRNA. |
| 219209_at                   | MDA5      | melanoma differentiation associated protein-5                                                                                                                                                                   |
| AFFX-HUMISGF3A/M97935_MA_at | STAT1     |                                                                                                                                                                                                                 |
| 202270_at                   | GBP1      | guanylate binding protein 1, interferon-inducible, 67 kD                                                                                                                                                        |
| 211012_s_at                 | PML       | promyelocytic leukemia                                                                                                                                                                                          |
| 202446_s_at                 | PLSCR1    | phospholipid scramblase 1                                                                                                                                                                                       |
| 209762_x_at                 | SP110     | SP110 nuclear body protein                                                                                                                                                                                      |
| 210705_s_at                 | TRIM5     | tripartite motif-containing 5                                                                                                                                                                                   |
| 243271_at                   |           | Transcribed sequences                                                                                                                                                                                           |
| 228439_at                   | MGC20410  | hypothetical protein BC012330                                                                                                                                                                                   |
| 209589_s_at                 | EPHB2     | EphB2                                                                                                                                                                                                           |
| 208012_x_at                 | SP110     | SP110 nuclear body protein                                                                                                                                                                                      |
| 202430_s_at                 | PLSCR1    | phospholipid scramblase 1                                                                                                                                                                                       |
| 244414_at                   |           | Transcribed sequences                                                                                                                                                                                           |
| 1554343_a_at                | BRDG1     | BCR downstream signaling 1                                                                                                                                                                                      |
| 235157_at                   |           | UI-H-BW0-aiy-a-04-0-UI.s1 NCI_CGAP_Sub6 <i>Homo sapiens</i> cDNA clone IMAGE:2730894 3', mRNA sequence.                                                                                                         |
| 219364_at                   | LGP2      | likely ortholog of mouse D11lgp2                                                                                                                                                                                |
| 206486_at                   | LAG3      | lymphocyte-activation gene 3                                                                                                                                                                                    |
| 214038_at                   | CCL8      | wr88g11.x1 NCI_CGAP_Kid11 <i>Homo sapiens</i> cDNA clone IMAGE:2494820 3' similar to SW:MCP2_HUMAN P80075 MONOCYTE CHEMOTACTIC PROTEIN 2 PRECURSOR ;, mRNA sequence.                                            |
| 242234_at                   | HSXIAPAF1 | XIAP associated factor-1                                                                                                                                                                                        |
| 228617_at                   | HSXIAPAF1 | zl40a07.s1 Soares_pregnant_uterus_NbHPU <i>Homo sapiens</i> cDNA clone IMAGE:504372 3' similar to contains MER13.t1 MER13 repetitive element;, mRNA sequence.                                                   |
| AFFX-HUMISGF3A/M97935_5_at  | STAT1     |                                                                                                                                                                                                                 |
| AFFX-HUMISGF3A/M97935_MB_at | STAT1     |                                                                                                                                                                                                                 |
| 221703_at                   | BRIP1     | BRCA1 interacting protein C-terminal helicase 1                                                                                                                                                                 |
| 223980_s_at                 | SP110     | SP110 nuclear body protein                                                                                                                                                                                      |
| 235276_at                   | EPSTI1    | epithelial stromal interaction 1 (breast)                                                                                                                                                                       |
| 217546_at                   | MT1K      | metallothionein 1K                                                                                                                                                                                              |
| 202357_s_at                 | BF        | B-factor, properdin                                                                                                                                                                                             |
| 1552623_at                  | HSH2D     | hematopoietic SH2 protein                                                                                                                                                                                       |



|              |                 |                                                                                                         |
|--------------|-----------------|---------------------------------------------------------------------------------------------------------|
| 1556643 at   | LOC93343        | <i>Homo sapiens</i> cDNA FLJ31061 fis, clone HSYRA2000927.                                              |
| 228152 s at  | FLJ31033        | hypothetical protein FLJ31033                                                                           |
| 202869 at    | OAS1            | 2',5'-oligoadenylate synthetase 1, 40/46 kD                                                             |
| 232155 at    | KIAA1618        | KIAA1618                                                                                                |
| 213294 at    | FLJ38348        | hypothetical protein FLJ38348                                                                           |
| 207777 s at  | SP140           | SP140 nuclear body protein                                                                              |
| 208075 s at  | CCL7            | chemokine (C-C motif) ligand 7                                                                          |
| 209761 s at  | SP110           | SP110 nuclear body protein                                                                              |
| 209035 at    | MDK             | midkine (neurite growth-promoting factor 2)                                                             |
| 228714 at    |                 | MRNA; cDNA DKFZp686G1498 (from clone DKFZp686G1498)                                                     |
| 206513 at    | AIM2            | absent in melanoma 2                                                                                    |
| 224701 at    | KIAA1268        | KIAA1268 protein                                                                                        |
| 239979 at    |                 | Transcribed sequences                                                                                   |
| 1554957 at   |                 | CDNA clone MGC:16021 IMAGE:3606756, complete cds                                                        |
| 203820 s at  | IMP-3           | IGF-II mRNA-binding protein 3                                                                           |
| 206503 x at  | PML             | promyelocytic leukemia                                                                                  |
| 205552 s at  | OAS1            | 2',5'-oligoadenylate synthetase 1, 40/46 kD                                                             |
| 201649 at    | UBE2L6          | ubiquitin-conjugating enzyme E2L 6                                                                      |
| 204211 x at  | PRKR            | protein kinase, interferon-inducible double stranded RNA dependent                                      |
| 216598 s at  | CCL2            | chemokine (C-C motif) ligand 2                                                                          |
| 202307 s at  | TAP1            | transporter 1, ATP-binding cassette, sub-family B (MDR/TAP)                                             |
| 202269 x at  | GBP1            | guanylate binding protein 1, interferon-inducible, 67 kD                                                |
| 225415 at    | BBAP            | rhysin 2                                                                                                |
| 242961 x at  | RIG-I           | DEAD/H (Asp-Glu-Ala-Asp/His) box polypeptide                                                            |
| 227347 x at  | Hes4            | bHLH factor Hes4                                                                                        |
| 213982 s at  | HHL             | expressed in hematopoietic cells, heart, liver                                                          |
| 239587 at    |                 | Transcribed sequences                                                                                   |
| 211013 x at  | PML             | promyelocytic leukemia                                                                                  |
| 204804 at    | SSA1            | Sjogren syndrome antigen A1 (52 kD, ribonucleoprotein autoantigen SS-A/Ro)                              |
| 209546 s at  | APOL1           | apolipoprotein L, 1                                                                                     |
| 228607 at    | OAS2            | wb07a12.x1 NCI_CGAP_GC6 <i>Homo sapiens</i> cDNA clone IMAGE:2304958 3', mRNA sequence.                 |
| 1569403 at   |                 | Similar to hypothetical protein PRO1722, clone IMAGE:4706427, mRNA                                      |
| 237105 at    | PRKRA           | protein kinase, interferon-inducible double stranded RNA dependent activator                            |
| 227262 at    | HAPLN3          | hyaluronan and proteoglycan link protein 3                                                              |
| 1555785 a at | 1-Sep           | strand-exchange protein 1                                                                               |
| 1559582 at   |                 | Clone IMAGE:5441133, mRNA                                                                               |
| 225510 at    | NS5ATP13<br>TP2 | NS5ATP13TP2 protein                                                                                     |
| 218051 s at  | FLJ12442        | hypothetical protein FLJ12442                                                                           |
| 227038 at    | MGC26963        | hypothetical protein MGC26963                                                                           |
| 228560 at    | CACNA1D         | calcium channel, voltage-dependent, L type, $\alpha$ 1D subunit                                         |
| 219225 at    | PGBD5           | piggyBac transposable element derived 5                                                                 |
| 1555788 a at | TRIB3           | chromosome 20 open reading frame 97                                                                     |
| 223366 at    |                 | Clone IMAGE:3618365, mRNA                                                                               |
| 228403 at    | UNQ470          | GAAI470                                                                                                 |
| 225802 at    | TOP1MT          | mitochondrial topoisomerase I                                                                           |
| 1554343 a at | BRDG1           | BCR downstream signaling 1                                                                              |
| 235157 at    |                 | UI-H-BW0-aiy-a-04-0-UI.s1 NCI_CGAP_Sub6 <i>Homo sapiens</i> cDNA clone IMAGE:2730894 3', mRNA sequence. |

|                             |           |                                                                                                                                                                      |
|-----------------------------|-----------|----------------------------------------------------------------------------------------------------------------------------------------------------------------------|
| 219364_at                   | LGP2      | likely ortholog of mouse D111gp2                                                                                                                                     |
| 206486_at                   | LAG3      | lymphocyte-activation gene 3                                                                                                                                         |
| 214038_at                   | CCL8      | wr88g11.x1 NCI_CGAP_Kid11 <i>Homo sapiens</i> cDNA clone IMAGE:2494820 3' similar to SW:MCP2_HUMAN P80075 MONOCYTE CHEMOTACTIC PROTEIN 2 PRECURSOR ;, mRNA sequence. |
| 242234_at                   | HSXIAPAF1 | XIAP associated factor-1                                                                                                                                             |
| 228617_at                   | HSXIAPAF1 | zl40a07.s1 Soares_pregnant_uterus_NbHPU <i>Homo sapiens</i> cDNA clone IMAGE:504372 3' similar to contains MER13.t1 MER13 repetitive element ;, mRNA sequence.       |
| AFFX-HUMISGF3A/M97935_5_at  | STAT1     |                                                                                                                                                                      |
| AFFX-HUMISGF3A/M97935_MB_at | STAT1     |                                                                                                                                                                      |
| 221703_at                   | BRIP1     | BRCA1 interacting protein C-terminal helicase 1                                                                                                                      |
| 223980_s_at                 | SP110     | SP110 nuclear body protein                                                                                                                                           |
| 235276_at                   | EPSTI1    | epithelial stromal interaction 1 (breast)                                                                                                                            |
| 217546_at                   | MT1K      | metallothionein 1K                                                                                                                                                   |
| 202357_s_at                 | BF        | B-factor, properdin                                                                                                                                                  |
| 1552623_at                  | HSH2D     | hematopoietic SH2 protein                                                                                                                                            |
| 1556643_at                  | LOC93343  | <i>Homo sapiens</i> cDNA FLJ31061 fis, clone HSYRA2000927.                                                                                                           |
| 228152_s_at                 | FLJ31033  | hypothetical protein FLJ31033                                                                                                                                        |
| 202869_at                   | OAS1      | 2',5'-oligoadenylate synthetase 1, 40/46 kD                                                                                                                          |
| 232155_at                   | KIAA1618  | KIAA1618                                                                                                                                                             |
| 213294_at                   | FLJ38348  | hypothetical protein FLJ38348                                                                                                                                        |
| 207777_s_at                 | SP140     | SP140 nuclear body protein                                                                                                                                           |
| 208075_s_at                 | CCL7      | chemokine (C-C motif) ligand 7                                                                                                                                       |
| 209761_s_at                 | SP110     | SP110 nuclear body protein                                                                                                                                           |
| 209035_at                   | MDK       | midkine (neurite growth-promoting factor 2)                                                                                                                          |
| 228714_at                   |           | MRNA; cDNA DKFZp686G1498 (from clone DKFZp686G1498)                                                                                                                  |
| 206513_at                   | AIM2      | absent in melanoma 2                                                                                                                                                 |
| 224701_at                   | KIAA1268  | KIAA1268 protein                                                                                                                                                     |
| 239979_at                   |           | Transcribed sequences                                                                                                                                                |
| 1554957_at                  |           | CDNA clone MGC:16021 IMAGE:3606756, complete cds                                                                                                                     |
| 203820_s_at                 | IMP-3     | IGF-II mRNA-binding protein 3                                                                                                                                        |
| 206503_x_at                 | PML       | promyelocytic leukemia                                                                                                                                               |
| 205552_s_at                 | OAS1      | 2',5'-oligoadenylate synthetase 1, 40/46 kD                                                                                                                          |
| 201649_at                   | UBE2L6    | ubiquitin-conjugating enzyme E2L 6                                                                                                                                   |
| 204211_x_at                 | PRKR      | protein kinase, interferon-inducible double stranded RNA dependent                                                                                                   |
| 216598_s_at                 | CCL2      | chemokine (C-C motif) ligand 2                                                                                                                                       |
| 202307_s_at                 | TAP1      | transporter 1, ATP-binding cassette, sub-family B (MDR/TAP)                                                                                                          |
| 202269_x_at                 | GBP1      | guanylate binding protein 1, interferon-inducible, 67 kD                                                                                                             |
| 225415_at                   | BBAP      | rhysin 2                                                                                                                                                             |
| 242961_x_at                 | RIG-I     | DEAD/H (Asp-Glu-Ala-Asp/His) box polypeptide                                                                                                                         |
| 227347_x_at                 | Hes4      | bHLH factor Hes4                                                                                                                                                     |
| 213982_s_at                 | HHL       | expressed in hematopoietic cells, heart, liver                                                                                                                       |
| 239587_at                   |           | Transcribed sequences                                                                                                                                                |
| 211013_x_at                 | PML       | promyelocytic leukemia                                                                                                                                               |

|              |                 |                                                                                         |
|--------------|-----------------|-----------------------------------------------------------------------------------------|
| 204804_at    | SSA1            | Sjogren syndrome antigen A1 (52 kD, ribonucleoprotein autoantigen SS-A/Ro)              |
| 209546_s_at  | APOL1           | apolipoprotein L, 1                                                                     |
| 228607_at    | OAS2            | wb07a12.x1 NCI_CGAP_GC6 <i>Homo sapiens</i> cDNA clone IMAGE:2304958 3', mRNA sequence. |
| 1569403_at   |                 | Similar to hypothetical protein PRO1722, clone IMAGE:4706427, mRNA                      |
| 237105_at    | PRKRA           | protein kinase, interferon-inducible double stranded RNA dependent activator            |
| 227262_at    | HAPLN3          | hyaluronan and proteoglycan link protein 3                                              |
| 1555785_a_at | 1-Sep           | strand-exchange protein 1                                                               |
| 1559582_at   |                 | Clone IMAGE:5441133, mRNA                                                               |
| 225510_at    | NS5ATP13<br>TP2 | NS5ATP13TP2 protein                                                                     |
| 218051_s_at  | FLJ12442        | hypothetical protein FLJ12442                                                           |
| 227038_at    | MGC26963        | hypothetical protein MGC26963                                                           |
| 228560_at    | CACNA1D         | calcium channel, voltage-dependent, L type, $\alpha$ 1D subunit                         |
| 219225_at    | PGBD5           | piggyBac transposable element derived 5                                                 |
| 1555788_a_at | TRIB3           | chromosome 20 open reading frame 97                                                     |
| 223366_at    |                 | Clone IMAGE:3618365, mRNA                                                               |
| 228403_at    | UNQ470          | GAAI470                                                                                 |
| 225802_at    | TOP1MT          | mitochondrial topoisomerase I                                                           |

Gene expression profiles were analyzed by Affymetrix microarrays (U133Plus2.0).
